# Supplementary material
Source: Springer Nature journal article supplement (https://www.springermedizin.de/resource/supplementary/12906_2014_2071_MOESM1_ESM.pdf/9523600)
Supplement: MOESM1 [file 9523600]

## **Additional file 1: supplemental method**

### **The HPLC analysis of KSY**

The aqueous extract of KSY, extract of individual herb, and standard solution (calycosin-7-O- $\beta$ -D-glucoside, liquiritinapioside, liquiritin, and glycyrrhizic acid) were pre-treated by ultrasonic agitation for 30 min and filtered through a 0.45  $\mu$ m PTFE membrane filter. Subsequently, 20-30 microliter of each sample was respectively injected into a HPLC equipped with Waters 600C controller, a Waters 717 plus autosampler, a Waters 2996 photodiode array detector, and a 250  $\times$  4.6 mm column with particle size 5  $\mu$ m (Inertsil ph, GL Sciences, Inc., CA, USA). A 0.1 % phosphoric acid in water (A) and acetonitrile (B) was used as the mobile phase, the gradient elution was programmed as follows: 0–10 min, A/B:100/0 $\rightarrow$ 90/10; 10–30 min, A/B:90/10 $\rightarrow$ 80/20; 30–60 min, A/B:80/20 $\rightarrow$ 70/30; 60–100 min, A/B:70/30 $\rightarrow$ 40/60; 100–110 min, A/B:40/60 $\rightarrow$ 0/100; 110–120 min, 100% B. Column temperature was maintained at room temperature. Analysis was performed at a flow rate of 0.8 mL/min with the detector wavelength set at 210nm - 400 nm.
